# Supplementary material for: Nitrogen Oxidation in a Multi-Pin Plasma System in the Presence and Absence of a Plasma/Liquid Interface
Source: MDPI journal article supplement (doi:10.3390/app13137619), 2023-06-28
Supplement: s1 [file s1]

Archive with 1 entries (1 files):
- applsci-2468445-supplementary.pdf
